# Supplementary material
Source: HighWire-hosted journal article supplement (http://www.jneurosci.org/highwire/filestream/601495/field_highwire_adjunct_files/0/Supplemental_Figures.pdf)

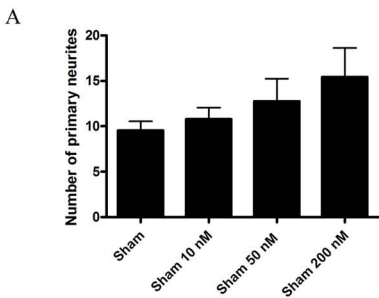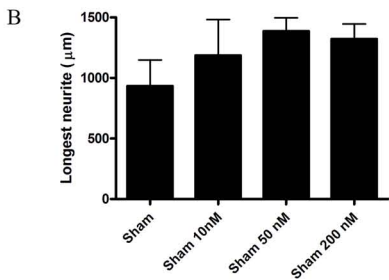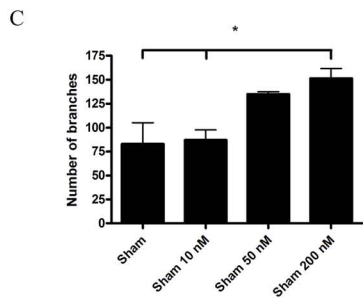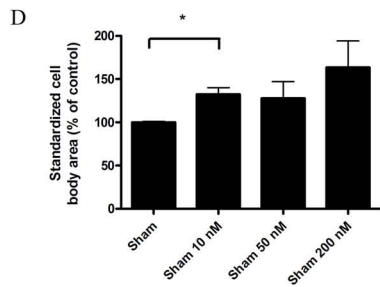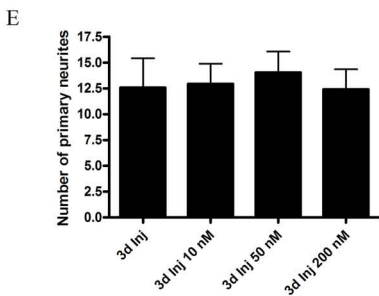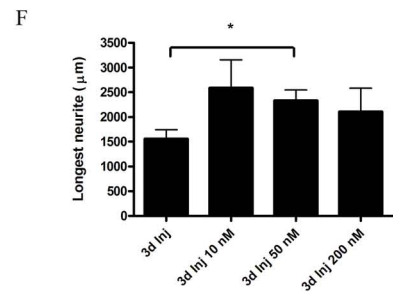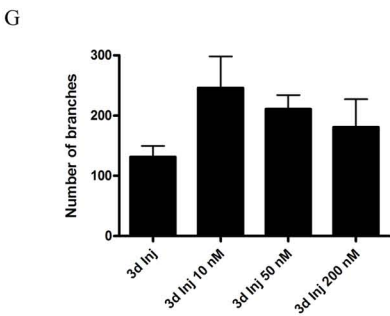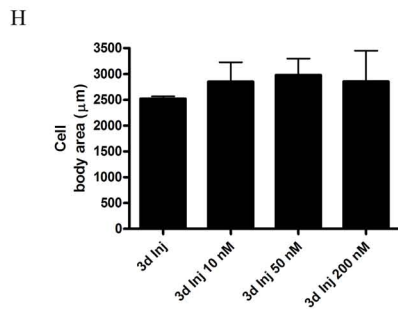

Control

10 nM bpV(pic)

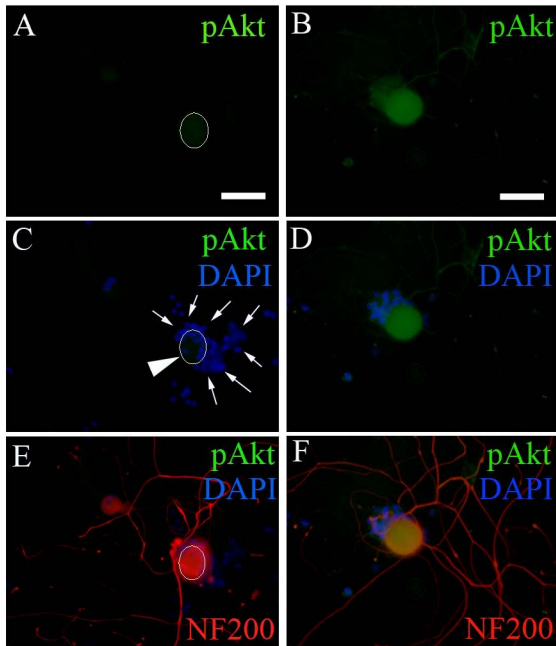

A

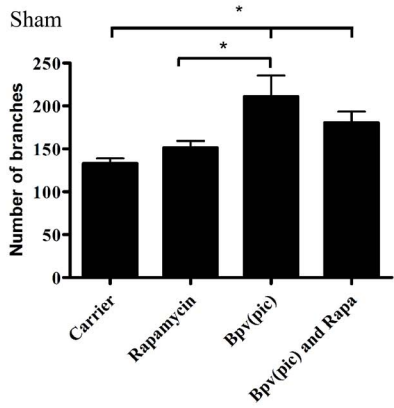

B

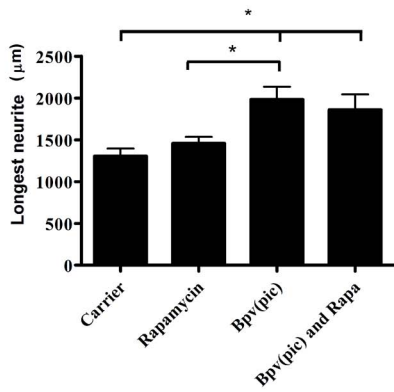

C

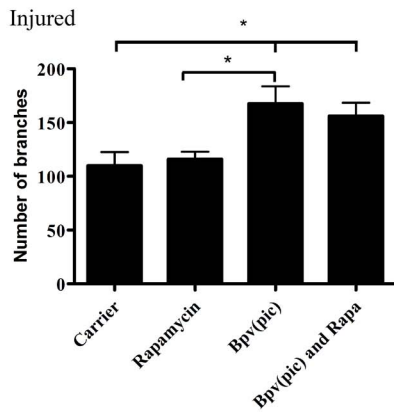

D

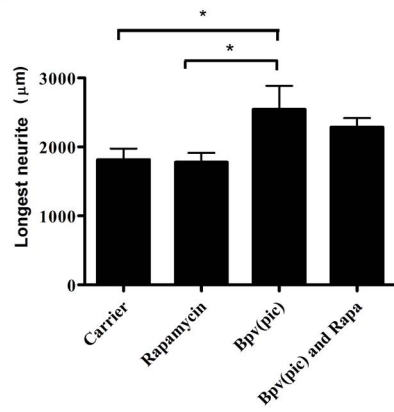

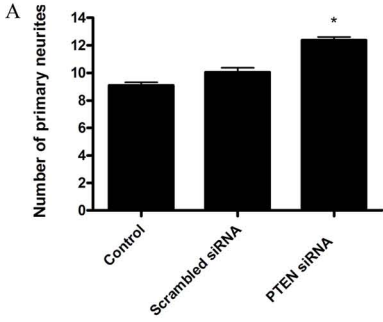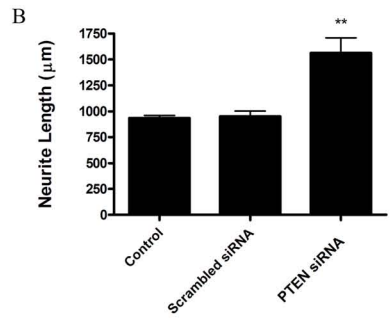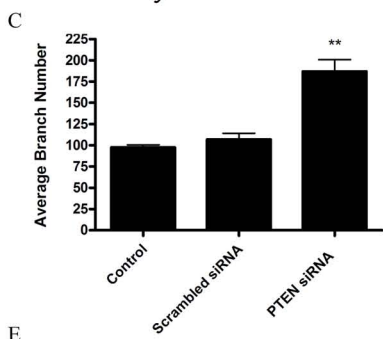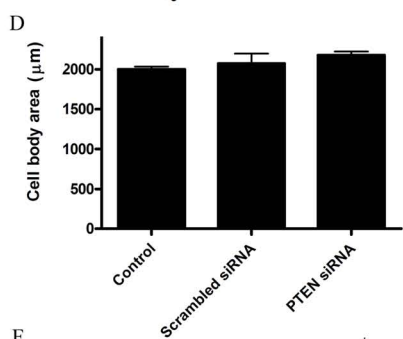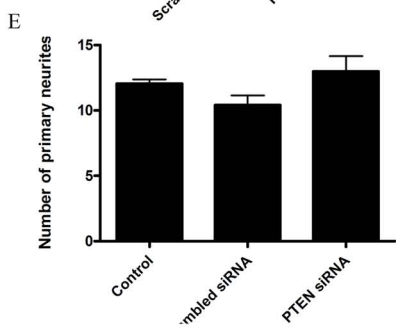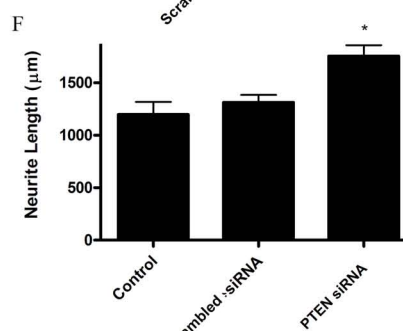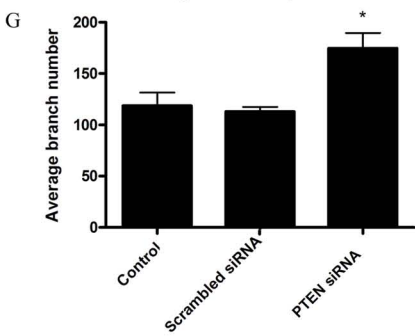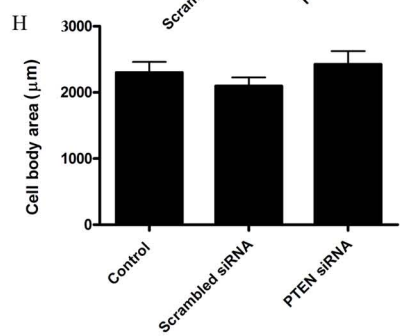

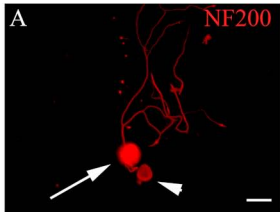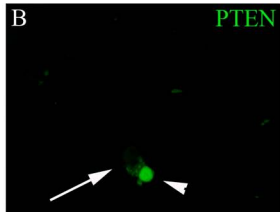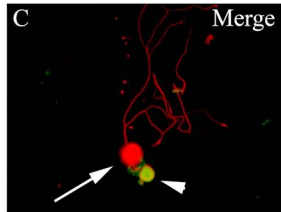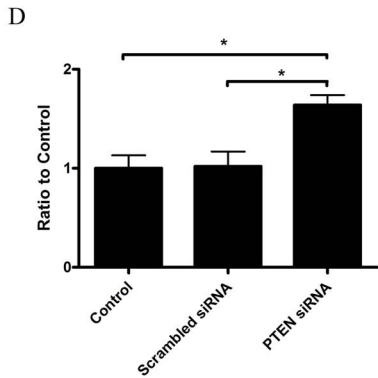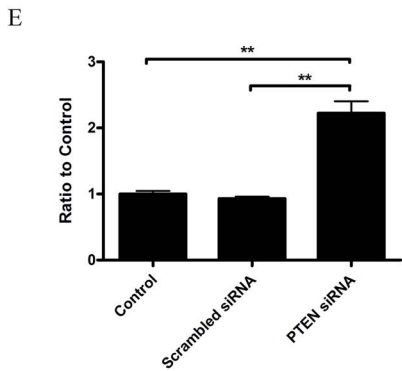

Supplement: Supplemental_Figures.pdf [file Supplemental_Figures.pdf]
